# Supplementary material for: Risky business: a longitudinal study examining cigarette smoking initiation among susceptible and non-susceptible e-cigarette users in Canada
Source: PubMed Central journal article supplement — BMJ Open. 2018 May 26;8(5):e021080. doi: 10.1136/bmjopen-2017-021080 (PMC5988055; doi:10.1136/bmjopen-2017-021080), 2018-05-26
Supplement: bmjopen-2017-021080.draft_revisions.pdf [file bmjopen-2017-021080.draft_revisions.pdf]

# BMJ Open

BMJ Open is committed to open peer review. As part of this commitment we make the peer review history of every article we publish publicly available.

When an article is published we post the peer reviewers' comments and the authors' responses online. We also post the versions of the paper that were used during peer review. These are the versions that the peer review comments apply to.

The versions of the paper that follow are the versions that were submitted during the peer review process. They are not the versions of record or the final published versions. They should not be cited or distributed as the published version of this manuscript.

BMJ Open is an open access journal and the full, final, typeset and author-corrected version of record of the manuscript is available on our site with no access controls, subscription charges or pay-per-view fees (<http://bmjopen.bmj.com>).

If you have any questions on BMJ Open's open peer review process please email [info.bmjopen@bmj.com](mailto:info.bmjopen@bmj.com)

# BMJ Open

## **Risky Business: A longitudinal study examining cigarette smoking initiation among susceptible and non-susceptible e-cigarette users**

|                               |                                                                                                                                                                                                                                                                                                                                             |
|-------------------------------|---------------------------------------------------------------------------------------------------------------------------------------------------------------------------------------------------------------------------------------------------------------------------------------------------------------------------------------------|
| Journal:                      | <i>BMJ Open</i>                                                                                                                                                                                                                                                                                                                             |
| Manuscript ID                 | bmjopen-2017-021080                                                                                                                                                                                                                                                                                                                         |
| Article Type:                 | Research                                                                                                                                                                                                                                                                                                                                    |
| Date Submitted by the Author: | 11-Jan-2018                                                                                                                                                                                                                                                                                                                                 |
| Complete List of Authors:     | Aleyan, Sarah; University of Waterloo School of Public Health and Health Systems<br>Cole, Adam; University of Waterloo School of Public Health and Health Systems<br>Qian, Wei; University of Waterloo School of Public Health and Health Systems<br>Leatherdale, Scott ; University of Waterloo School of Public Health and Health Systems |
| Keywords:                     | e-cigarettes, cigarettes, youth, adolescents, susceptibility                                                                                                                                                                                                                                                                                |
|                               |                                                                                                                                                                                                                                                                                                                                             |

SCHOLARONE™  
Manuscripts

Peer Review Only

1  
2  
3 Risky Business: A longitudinal study examining cigarette smoking initiation  
4  
5  
6 among susceptible and non-susceptible e-cigarette users  
7  
8

9 Sarah Aleyan, MSc<sup>1</sup>

10 Adam Cole, MSc<sup>1</sup>

11 Wei Qian, MSc<sup>1</sup>

12 Scott T. Leatherdale, PhD<sup>1</sup>

13 1-School of Public Health and Health Systems, University of Waterloo, Ontario  
14  
15  
16  
17  
18

19 Please send correspondence and reprints to:

20 Sarah Aleyan, MSc

21 School of Public Health and Health Systems

22 University of Waterloo

23 200 University Avenue

24 Waterloo, ON

25 Canada

26 N2L 3G1  
27  
28  
29  
30  
31  
32  
33  
34  
35

36 Phone: (519) 888-4567

37 Fax: (519) 746-2510

38 E-mail: [saleyan@uwaterloo.ca](mailto:saleyan@uwaterloo.ca)

39 Word Count: 2210 words  
40  
41  
42  
43  
44  
45  
46  
47  
48  
49  
50  
51  
52  
53  
54  
55  
56  
57  
58  
59  
60

**ABSTRACT:**

**Objectives:** Given that many adolescent e-cigarette users are never smokers, the possibility that e-cigarettes may act as a gateway to future cigarette smoking has been discussed in various studies. Additional longitudinal data are needed to explore the pathway between e-cigarette and tobacco cigarette use, particularly among different risk groups including susceptible and non-susceptible never smokers. The objective of this study was to examine whether baseline use of e-cigarettes among a sample of never-smoking youth was associated with cigarette smoking initiation over a two-year follow-up.

**Design:** Longitudinal cohort study

**Setting:** 89 high schools across Ontario and Alberta, Canada.

**Participants:** A sample of gr. 9-11 never-smoking students at baseline (n=9501) that participated in the COMPASS study over two years.

**Primary and Secondary Outcome Measures:** Participants completed in-class questionnaires that assessed susceptibility to future smoking and smoking initiation.

**Results:** Among the baseline sample of non-susceptible never-smokers, 45.2% of current e-cigarette users reported trying a cigarette at the two-year follow-up compared to 13.5% of non-current e-cigarette users. Among the baseline sample of susceptible never-smokers, 62.4% of current e-cigarette users reported trying a cigarette at the two-year follow-up compared to 36.1 % of non-current e-cigarette users. Overall, current e-cigarette users at baseline were more likely to try cigarette smoking 2 years later. This association was even stronger among the sample of non-susceptible never smokers (Adjusted OR = 5.38, 95 % CI 2.85 to 10.17; p<0.0001) compared to susceptible never smokers (Adjusted OR= 2.94, 95 % CI 1.94 to 4.46; p<0.0001).

**Conclusions:** The findings from this large, longitudinal study support public health concerns that e-cigarette use may contribute to the development of a new population of cigarette smokers, even among adolescents that held no intentions to smoke in the future. These findings underscore the need for sustained efforts to prevent e-cigarette use among youth populations, especially those at lowest risk for smoking.

**Keywords:** *e-cigarettes, cigarettes, youth, adolescents, susceptibility*

**Strengths and Limitations of this study:**

- This study assessed the relationship between e-cigarette use among never-smoking adolescents and smoking initiation using a large longitudinal sample.
- This study examined transitions in smoking behaviour among adolescents at different risk levels (i.e. susceptible and non-susceptible never smokers).
- The measures of e-cigarette use used within this study did not provide information regarding the types of e-cigarettes being used.
- This study focused solely on cigarette smoking initiation outcomes.

**BACKGROUND**

Despite the declining prevalence of smoking in most countries globally, tobacco use remains a threat to global health. In 2013, tobacco use accounted for the loss of approximately 6.1 million lives and 143.5 million disability-adjusted life-years (DALYs) world-wide [1-2]. Considering that the majority of smokers try their first cigarette during adolescence [3], preventing youth smoking initiation represents a key public health priority.

Electronic cigarettes are battery-operated devices that deliver nicotine and vaporize a liquid mixture made up of propylene glycol, nicotine, flavouring agents and other chemicals. The rise in e-cigarette use among youth has created discussion regarding the public health implications. While some within the tobacco control community believe that e-cigarettes could be used as smoking cessation aids and help reduce smoking-related harms [4], others have

1  
2  
3 argued against this considering the limited evidence of the long-term effects of e-cigarettes [5].  
4  
5 Additionally, given that many adolescent e-cigarette users are never smokers [6-7], the  
6  
7 possibility that e-cigarette use may act as a gateway to future cigarette behaviour has been  
8  
9 discussed in various studies [8-9]. A recent meta-analysis by Soneji et al. (2017) found consistent  
10  
11 evidence of an association between initial e-cigarette use and subsequent cigarette smoking  
12  
13 initiation [10].  
14  
15

16  
17 Given that intentions to smoke in the future are a strong predictor of future cigarette  
18  
19 smoking, it is likely that smoking initiation among youth in these studies primarily occurs among  
20  
21 those that are already at risk of (i.e., susceptible to) future smoking. Studies have recently begun  
22  
23 to explore the association between e-cigarette use and smoking initiation among different risk  
24  
25 groups. Smoking susceptibility, defined as the lack of a firm commitment not to smoke among  
26  
27 never smokers, is a validated and reliable predictor of tobacco cigarette smoking initiation  
28  
29 among adolescents [11-12]. It is hypothesized that the use of e-cigarettes by never-smoking  
30  
31 youth may increase their susceptibility to future smoking. Cross-sectional studies suggest that  
32  
33 never smoking youth that have ever and currently use e-cigarettes are at increased odds of being  
34  
35 susceptible to future smoking, with a stronger association identified among younger students  
36  
37 [13-16]. To our knowledge, only two longitudinal studies have examined the progression from  
38  
39 non-susceptible never smoker to susceptible never smoker or ever smoker among e-cigarette and  
40  
41 non-e-cigarette users; however, both studies included older adolescent and young adult  
42  
43 populations. The first longitudinal study identified that youth and young adult non-susceptible  
44  
45 never smokers that used e-cigarettes at baseline were more likely to become susceptible never  
46  
47 smokers and try smoking cigarettes at 1 year follow-up [17]. The second longitudinal study  
48  
49  
50  
51  
52  
53  
54  
55  
56  
57  
58  
59  
60

1  
2  
3 identified that grade 11 and 12 non-susceptible never smokers that used e-cigarettes at baseline  
4  
5 were more likely to initiate cigarette smoking at follow-up [18].  
6  
7

8 It is evident that additional longitudinal data that use younger students and a longer  
9  
10 follow-up period are needed to explore the potential association between e-cigarette use and  
11  
12 subsequent cigarette use among different risk groups. This study examined whether baseline use  
13  
14 of e-cigarettes among a sample of susceptible and non-susceptible never-smoking youth was  
15  
16 associated with cigarette smoking initiation over a two-year follow-up.  
17  
18

## 19 20 **METHODS**

### 21 22 **Design**

23  
24  
25  
26 COMPASS is a prospective cohort study (2012-2021) designed to gather longitudinal and  
27  
28 hierarchical data from a sample of secondary school students [19]. This paper reports on  
29  
30 longitudinal findings between Year 2 (2013-2014) and Year 4 (2015-2016) of the study among a  
31  
32 sample of schools that agreed to the use of active-information passive consent permission  
33  
34 procedures. For ease of description, Year 2 will be considered “baseline” and Year 4 will be  
35  
36 considered “follow-up”. Year 2 data were selected as baseline due to the larger sample size [20]  
37  
38 and since this was the first year e-cigarette use was assessed. Data relating to student health  
39  
40 behaviours were collected using the COMPASS student questionnaire (Cq). A full description of  
41  
42 the COMPASS study along with its methods is available online ([www.compass.uwaterloo.ca](http://www.compass.uwaterloo.ca))  
43  
44 and in print [18]. The University of Waterloo Research Ethics Board along with participating  
45  
46 school board review panels approved all procedures used.  
47  
48  
49  
50

### 51 52 **Participants**

53  
54  
55  
56  
57

1  
2  
3 At baseline, data were gathered from 45,298 grade 9 to 12 students (response rate of  
4 79.2%) attending 89 Ontario and Alberta secondary schools. At follow-up, data were gathered  
5 from 40,436 grade 9 to 12 secondary students (response rate of 79.9 %) attending 81 Ontario and  
6 Alberta secondary schools. The vast majority of missing respondents were a result of students  
7 being absent or on a spare during the data collection period; missing respondents due to parental  
8 refusal was limited (~0.4 %).

### 17 **Data Linkage**

19 To examine longitudinal changes among individuals, we linked student responses at  
20 baseline and follow-up using a unique code generated by each student [21]. A total of 11,215  
21 students in grades 9, 10 and 11 from 79 schools could be linked across both time points. We  
22 excluded students who reported ever having tried a cigarette at baseline (n=1,527) or who had  
23 missing data for any predictors/covariates (n=187), leaving a final linked sample of 9,501  
24 students.

### 35 **Measures**

37 Susceptibility to future smoking among never smoking students was measured using  
38 three validated measures: “Do you think in the future you might try smoking cigarettes?”, “If one  
39 of your best friends were to offer you a cigarette, would you smoke it?”, and “At any time during  
40 the next year, do you think you will smoke a cigarette?” Consistent with Pierce’s validated  
41 construct [11], individuals who responded “definitely not” to all three questions were categorized  
42 as non-susceptible to future smoking (i.e., low risk). Individuals who responded positively to at  
43 least one item were categorized as susceptible to future smoking (i.e., high risk).



1  
2  
3 Current (past 30 day) use of e-cigarettes was measured by asking students the following  
4 question: “In the last 30 days, did you use any of the following? (Mark all that apply)”. Students  
5 could choose one or more tobacco/nicotine products, including e-cigarettes (electronic cigarettes  
6 that look like cigarettes/cigars, but produce vapour instead of smoke). Respondents who reported  
7 having used e-cigarettes in the past 30 days were categorized as current e-cigarette users, while  
8 all others were categorized as non-current users.  
9  
10  
11  
12  
13  
14  
15

16  
17 Students also self-reported their gender (male or female), grade (9, 10, 11, 12) and  
18 ethnicity (Black, White, Asian, Latin-American, Aboriginal, Other/Mixed). Students’ social  
19 environment was measured by asking “How many of your closest friends smoke cigarettes?”  
20 (“None” to “5 or more friends”).  
21  
22  
23  
24  
25  
26

## 27 **ANALYSES**

28  
29  
30 Changes to self-reported susceptibility to future smoking were identified between  
31 baseline and follow-up among the sample of current and non-current e-cigarette users. Simple  
32 descriptive statistics examined the baseline characteristics of current and non-current e-cigarette  
33 users; chi-square tests identified differences between current and non-current e-cigarette users at  
34 baseline. We conducted two logistic regression models. The first, a multinomial logistic  
35 regression model, assessed whether e-cigarette use among non-susceptible youth at baseline  
36 predicted susceptibility to future smoking and smoking initiation at follow-up. The second, a  
37 binary logistic regression model assessed whether e-cigarette use among susceptible youth at  
38 baseline predicted smoking initiation at follow-up. Both models controlled for gender, grade,  
39 self-reported ethnicity, the number of friends that smoke cigarettes at baseline and student-level  
40 clustering within schools, as these covariates have been seen to influence smoking susceptibility  
41 outcomes.  
42  
43  
44  
45  
46  
47  
48  
49  
50  
51  
52  
53  
54  
55  
56  
57

## RESULTS

Table 1 presents the baseline characteristics of current and non-current e-cigarette users.

At baseline, significantly more male students, grade 10 students, students with friends that smoked cigarettes, and susceptible never-smokers reported current e-cigarette use than non-current e-cigarette use.

Table 1. Baseline characteristics of current and non-current e-cigarette users among students that reported never smoking cigarettes at baseline, 2013-2016 COMPASS study

| Variable                                   |                         | Non-Current E-cigarette Users (n=9295) | Current E-cigarette Users (n=206) | Chi-square |         |
|--------------------------------------------|-------------------------|----------------------------------------|-----------------------------------|------------|---------|
|                                            |                         |                                        |                                   | df         | p-value |
| Grade                                      | 9                       | 54.8 ( 5098)                           | 51.5 ( 106)                       | 2          | 0.6117  |
|                                            | 10                      | 42.2 ( 3923)                           | 45.6 ( 94)                        |            |         |
|                                            | 11                      | 2.9 ( 274)                             | 2.9 ( 6)                          |            |         |
| Gender                                     | Female                  | 52.6 ( 4889)                           | 37.9 ( 78)                        | 1          | <.0001  |
|                                            | Male                    | 47.4 ( 4406)                           | 62.1 ( 128)                       |            |         |
| Race                                       | White                   | 70.9 ( 6590)                           | 65.0 ( 134)                       | 5          | 0.0015  |
|                                            | Black                   | 2.6 ( 239)                             | 4.9 ( 10)                         |            |         |
|                                            | Asian                   | 4.7 ( 440)                             | 1.0 ( 2)                          |            |         |
|                                            | Off-Reserve Aboriginal  | 0.9 ( 83)                              | 1.9 ( 4)                          |            |         |
|                                            | Hispanic/Latin American | 1.0 ( 97)                              | 2.4 ( 5)                          |            |         |
|                                            | Other/Mixed             | 19.9 ( 1846)                           | 24.8 ( 51)                        |            |         |
| Number of friends that smoke cigarettes    | None                    | 81.7 ( 7594)                           | 63.6 ( 131)                       | 3          | <.0001  |
|                                            | 1                       | 10.7 ( 997)                            | 19.4 ( 40)                        |            |         |
|                                            | 2                       | 4.4 ( 408)                             | 8.7 ( 18)                         |            |         |
|                                            | 3 or more               | 3.2 ( 296)                             | 8.3 ( 17)                         |            |         |
| Susceptibility to future cigarette smoking | Not susceptible         | 71.2 ( 6616)                           | 35.4 ( 73)                        | 1          | <.0001  |
|                                            | Susceptible             | 28.8 ( 2679)                           | 64.6 ( 133)                       |            |         |

1  
2  
3 Figure 1 presents the smoking status of current and non-current e-cigarette users at  
4 follow-up among baseline non-susceptible never smokers. It is apparent that more current e-  
5 cigarette users reported trying tobacco cigarettes at follow-up relative to non-current e-cigarette  
6 users; roughly half of current e-cigarette users at baseline proceeded to trying a cigarette at  
7 follow-up. Figure 1 also presents the smoking status of current and non-current e-cigarette users  
8 at follow-up among baseline susceptible never smokers. Similarly, a larger proportion of current  
9 e-cigarette users reported trying cigarette smoking at follow-up, in comparison to non-current e-  
10 cigarette users.  
11  
12  
13  
14  
15  
16  
17  
18  
19  
20  
21

22 Figure 2 presents the adjusted odds of being susceptible to future smoking or trying  
23 cigarette smoking at follow-up among susceptible and non-susceptible current e-cigarette users  
24 at baseline (relative to non-current users). After controlling for relevant covariates, non-  
25 susceptible current e-cigarette users at baseline were significantly more likely to become  
26 susceptible to future smoking and try cigarette smoking at follow-up relative to non-current e-  
27 cigarette users. Similarly, susceptible current e-cigarette users at baseline were significantly  
28 more likely to try cigarette smoking at follow-up relative to non-current e-cigarette users.  
29  
30  
31  
32  
33  
34  
35  
36  
37  
38

## 39 DISCUSSION

40  
41  
42 Within the sample of never cigarette smokers at baseline, this study found that current e-  
43 cigarette users were at a higher risk of cigarette smoking initiation after a two-year follow-up  
44 period. These findings were consistent with previous studies that have demonstrated that  
45 adolescents with a history of e-cigarette use were a greater risk for future cigarette use [9, 13]. Of  
46 concern, the observed association between e-cigarette use and smoking initiation was found to be  
47 even stronger among individuals that were not susceptible to future smoking (i.e., low risk).  
48  
49  
50  
51  
52  
53  
54  
55  
56  
57  
58  
59  
60

1  
2  
3 These results support public health concerns that electronic cigarette use may contribute towards  
4 the development of a new population of cigarette smokers [13, 16], even among adolescents at  
5 low risk of future smoking experimentation.  
6  
7  
8  
9

10 Our results demonstrated an increased risk of smoking experimentation with current e-  
11 cigarette use at baseline; however, only a small percentage of non-smoking students reported  
12 using e-cigarettes in the past 30 days (4.0 %). Though this may be seen as having a small overall  
13 effect with regards to the public health implications, it should be noted that prior work has  
14 demonstrated that a substantial number of adolescents have tried using e-cigarettes and that  
15 never smokers comprise the largest population of youth [21-22]. As such, continued surveillance  
16 is crucial to monitor the use of e-cigarettes among non-smoking and smoking youth populations.  
17  
18  
19  
20  
21  
22  
23  
24  
25  
26

27 The use of e-cigarettes by non-susceptible never smoking youth may be explained in part  
28 by the availability of appealing flavouring agents including candy or fruit-flavours. Currently,  
29 there are over 7000 distinct flavours available for the e-liquid solutions used in e-cigarettes [23].  
30 A recent review identified that the preference for sweetened tobacco products was higher among  
31 youth than adult populations [24]. Previous research has also shown the growing appeal of  
32 flavoured tobacco products among Canadian adolescents [25]. Banning e-cigarette flavours to  
33 limit their attractiveness may be an important step to reduce the appeal of these products to  
34 youth.  
35  
36  
37  
38  
39  
40  
41  
42  
43  
44  
45

46 Additionally, e-cigarette promotion has proliferated through a number of channels  
47 including billboards, radio, television advertising, celebrity endorsement and online media  
48 platforms [26-27]. It may be that the widespread promotion of these products have had  
49 unintended consequences of re-normalizing cigarette smoking and shifting social norms  
50  
51  
52  
53  
54  
55  
56  
57  
58  
59  
60

1  
2  
3 surrounding smoking, especially among low risk youth populations [28-29]. These marketing  
4 strategies may undermine wider tobacco control policies by inadvertently promoting smoking.  
5  
6

7  
8 Although some evidence exists to support the notion that e-cigarettes may be a less  
9 harmful alternative to cigarette smoking [30], it is also important to simultaneously consider the  
10 potential for harm creation among a population of non-smoking youth who would not have  
11 normally considered trying tobacco cigarettes. E-cigarettes may potentially lead to a rise in  
12 tobacco initiation rates, if youth who would not have otherwise tried smoking begin  
13 experimenting with e-cigarettes and then transition to using other tobacco products. Our findings  
14 reinforce the need for a comprehensive approach that addresses all forms of tobacco products in  
15 youth-focused prevention efforts, moving forward.  
16  
17  
18  
19  
20  
21  
22  
23  
24  
25

26  
27 The findings from this study hold important implications at a time when regulation  
28 surrounding the sales and promotion of e-cigarettes is either being tabled or passed in various  
29 jurisdictions [31]. For instance, within Canada, Bill S-5 will take existing regulations and  
30 restrictions on tobacco products and extend them to vaping products  
31 (<http://www.parl.ca/DocumentViewer/en/42-1/bill/S-5/third-reading>). Our findings lend support  
32 to the need for appropriate regulations that will reduce the appeal of e-cigarettes and discourage  
33 use among non-smoking youth.  
34  
35  
36  
37  
38  
39  
40  
41  
42  
43

44 The study has various strengths including the use of a large, longitudinal, school-based  
45 sample from two jurisdictions, Ontario and Alberta. Another key strength of this study included  
46 the use of passive consent procedures, which reduces the chances of producing a biased sample  
47 and increases participation rates [32]. However, the study is also subject to some limitations. For  
48 instance, the study was not able to assess the reasons behind e-cigarette use among the baseline  
49 sample of current e-cigarette users, as this question was only introduced in Year 4 of COMPASS  
50  
51  
52  
53  
54  
55  
56  
57

1  
2  
3 (2015-2016). However, moving forward, future longitudinal work may assess the main reasons  
4 driving youth e-cigarette use. In addition, the measures of e-cigarette use did not provide any  
5 information about the types of e-cigarettes used (e.g. flavoured/non-flavoured, with/without  
6 nicotine, mod/tank). Thus, associations between specific kinds of e-cigarettes and cigarette  
7 smoking initiation could not be examined. Lastly, this study focused solely on cigarette smoking  
8 initiation; future research should focus on examining other outcomes (e.g. smoking progression)  
9 and also examine relationships between e-cigarette use and initiation of other tobacco products  
10 (e.g. cigars, cigarillos) among different risk groups.  
11  
12  
13  
14  
15  
16  
17  
18  
19  
20  
21

## 22 **CONCLUSIONS**

23  
24  
25 Among non-smoking youth that were current e-cigarette users, our findings showed an  
26 increased risk of progressing to cigarette use after two years, even among adolescents that held  
27 no intentions to smoke in the future. These findings reinforce the need to adopt regulations aimed  
28 at reducing the appeal of e-cigarettes and deterring use among youth population. Additionally,  
29 our results point towards the need for sustained efforts focused on deterring the use of all forms  
30 of tobacco products, including e-cigarettes.  
31  
32  
33  
34  
35  
36  
37  
38  
39  
40  
41  
42  
43  
44  
45  
46  
47  
48  
49  
50  
51  
52  
53  
54  
55  
56  
57  
58  
59  
60

1  
2  
3  
4  
5  
6  
7  
8  
9  
10  
11  
12 Figure 1: Smoking status of current and non-current e-cigarette users among baseline non-  
13 susceptible and susceptible never smokers, 2013-2016 COMPASS study  
14  
15  
16  
17  
18  
19

20 Figure 2: Adjusted odds ratio estimate of becoming susceptible to future smoking and trying  
21 tobacco cigarette smoking at follow-up among baseline non-susceptible and susceptible never  
22 smokers, 2013-2016 COMPASS study  
23  
24  
25  
26  
27  
28  
29  
30  
31  
32  
33  
34  
35  
36  
37  
38  
39  
40  
41  
42  
43  
44  
45  
46  
47  
48  
49  
50  
51  
52  
53  
54  
55  
56  
57  
58  
59  
60

1  
2  
3  
4  
5  
6  
7  
8  
9 **Contributors:** SL designed the study. SA and AC formulated the research objectives and plan.  
10 Analysis of data was performed by WQ. SA and AC prepared the manuscript. All authors made  
11 revisions to the original draft and approved the final submitted version.  
12

13  
14 **Conflict of Interest:** The authors declare they have no conflicts of interest.  
15

16 **Funding:** The COMPASS study was supported by a bridge grant from the Canadian Institutes of  
17 Health Research (CIHR) Institute of Nutrition, Metabolism and Diabetes through the “Obesity –  
18 Interventions to Prevent or Treat” priority funding awards (OOP-110788; grant awarded to S.  
19 Leatherdale) and an operating grant from the CIHR Institute of Population and Public Health  
20 (IPPH) (MOP-114875; grant awarded to S. Leatherdale). Dr. Leatherdale is a  
21 Chair in Applied Public Health funded by the Public Health Agency of Canada in partnership  
22 with CIHR. Adam Cole is funded by CIHR.  
23  
24

25 **Ethics Approval:** Ethics approval was received by the University of Waterloo’s Office of  
26 Research Ethics and all participating school boards’ research ethics bodies.  
27

28 **Data sharing:** COMPASS data is stored at the University of Waterloo on a secure server. The  
29 principal investigator of COMPASS, Dr. Leatherdale, maintains ownership of all COMPASS  
30 data, and will grant access to COMPASS research collaborators, external research groups and  
31 students. For researchers looking to gain access to COMPASS data, individuals must  
32 successfully complete the COMPASS data usage application form, which is then reviewed and  
33 approved/declined by Dr. Leatherdale.  
34  
35  
36  
37  
38  
39  
40  
41  
42  
43  
44  
45  
46  
47  
48  
49  
50  
51  
52  
53  
54  
55  
56  
57  
58  
59  
60



## REFERENCES

1. GBD 2015 Risk Factors Collaborators. Global, regional, and national comparative risk assessment of 79 behavioural, environmental and occupational, and metabolic risks or clusters of risks, 1990-2015: a systematic analysis for the Global Burden of Disease Study 2015. *Lancet* 2016 Oct 8;388(10053):1659-1724.
2. World Health Organization. Global Status Report on noncommunicable diseases 2014. 2014.
3. U.S. Department of Health and Human Services. Preventing Tobacco Use Among Young People A Report of the General Surgeon. 1994.
4. Hartmann-Boyce J, McRobbie H, Bullen C, et al. Electronic cigarettes for smoking cessation. *Cochrane Database Syst Rev* 2016 Sep 14;9:CD010216.
5. Malas M, van der Tempel J, Schwartz R, et al. Electronic Cigarettes for Smoking Cessation: A Systematic Review. *Nicotine Tob Res* 2016 Oct;18(10):1926-1936.
6. Reid JL, Rynard VL, Czoli CD, et al. Who is using e-cigarettes in Canada? Nationally representative data on the prevalence of e-cigarette use among Canadians. *Prev Med* 2015 Dec;81:180-183.
7. Carroll Chapman SL, Wu LT. E-cigarette prevalence and correlates of use among adolescents versus adults: a review and comparison. *J Psychiatr Res* 2014 Jul;54:43-54.
8. Dutra LM, Glantz SA. Electronic cigarettes and conventional cigarette use among U.S. adolescents: a cross-sectional study. *JAMA Pediatr* 2014 Jul;168(7):610-617.
9. Leventhal AM, Strong DR, Kirkpatrick MG, et al. Association of Electronic Cigarette Use With Initiation of Combustible Tobacco Product Smoking in Early Adolescence. *JAMA* 2015 Aug 18;314(7):700-707.
10. Soneji S, Barrington-Trimis JL, Wills TA, et al. Association Between Initial Use of e-Cigarettes and Subsequent Cigarette Smoking Among Adolescents and Young Adults: A Systematic Review and Meta-analysis. *JAMA Pediatr* 2017 Aug 1;171(8):788-797.
11. Pierce JP, Choi WS, Gilpin EA, et al. Validation of susceptibility as a predictor of which adolescents take up smoking in the United States. *Health Psychol* 1996 Sep;15(5):355-361

12. Cole AG, Kennedy RD, Chaurasia A, Leatherdale ST. (Accepted). Exploring the predictive validity of the susceptibility to smoking construct for tobacco cigarettes, alternative tobacco products, and e-cigarettes. *Nicotine & Tobacco Research*. doi: 10.1093/ntr/ntx265.
13. Barrington-Trimis JL, Berhane K, Unger JB, et al. The E-cigarette Social Environment, E-cigarette Use, and Susceptibility to Cigarette Smoking. *J Adolesc Health* 2016 Jul; 59(1):75-80.
14. Bunnell RE, Agaku IT, Arrazola RA, et al. Intentions to smoke cigarettes among never-smoking US middle and high school electronic cigarette users: National Youth Tobacco Survey, 2011-2013. *Nicotine Tob Res* 2015 Feb; 17(2):228-235.
15. Park JY, Seo DC, Lin HC. E-Cigarette Use and Intention to Initiate or Quit Smoking Among US Youths. *Am J Public Health* 2016 Apr; 106(4):672-678.
16. Primack BA, Soneji S, Stoolmiller M, et al. Progression to Traditional Cigarette Smoking After Electronic Cigarette Use Among US Adolescents and Young Adults. *JAMA Pediatr* 2015 Nov; 169(11):1018-1023.
17. Barrington-Trimis JL, Urman R, Berhane K, et al. E-Cigarettes and Future Cigarette Use. *Pediatrics* 2016 Jul; 138(1):10.1542/peds.2016-0379.Epub 2016 Jun 13.
18. Leatherdale ST, Brown KS, Carson V, et al. The COMPASS study: a longitudinal hierarchical research platform for evaluating natural experiments related to changes in school-level programs, policies and built environment resources. *BMC Public Health* 2014 Apr 8; 14:331-2458-14-331.
19. Bredin C, Thompson-Haile A, Leatherdale ST. Supplemental sampling and recruitment of additional schools in Ontario. 2015.
20. Bredin C, Leatherdale ST. Methods of linking COMPASS student-level data over time. 2013.
21. Montreuil A, MacDonald M, Asbridge M, et al. Prevalence and correlates of electronic cigarette use among Canadian students: cross-sectional findings from the 2014/15 Canadian Student Tobacco, Alcohol and Drugs Survey. *CMAJ Open* 2017 Jun 14; 5(2):E460-E467.
22. Reid JL, Hammond D, Rynard VL, et al. Tobacco Use in Canada: Patterns and Trends. 2017.
23. Zhu SH, Sun JY, Bonnevie E, et al. Four hundred and sixty brands of e-cigarettes and counting: implications for product regulation. *Tob Control* 2014 Jul; 23 Suppl 3:iii3-9.
24. Hoffman AC, Salgado RV, Dresler C, et al. Flavour preferences in youth versus adults: a review. *Tob Control* 2016 Nov; 25(Suppl 2):ii32-ii39.
25. Bird Y, May J, Nwankwo C, et al. Prevalence and characteristics of flavoured tobacco use among students in grades 10 through 12: a national cross-sectional study in Canada, 2012-2013. *Tob Induc Dis* 2017 Mar 24; 15:20-017-0124-0.eCollection 2017.

- 1  
2  
3 26. de Andrade M, Hastings G, Angus K. Promotion of electronic cigarettes: tobacco marketing  
4 reinvented? *BMJ*2013Dec 21;347:f7473.  
5  
6  
7 27. Duke JC, Lee YO, Kim AE, et al. Exposure to electronic cigarette television advertisements  
8 among youth and young adults. *Pediatrics*2014Jul;134(1):e29-36.  
9  
10 28. Stanbrook MB. Electronic cigarettes and youth: a gateway that must be shut. *CMAJ*2016Aug  
11 9;188(11):785.  
12  
13 29. McKee M. Electronic cigarettes: proceed with great caution. *Int J Public*  
14 *Health*2014Oct;59(5):683-685.  
15  
16  
17 30. Glasser AM, Collins L, Pearson JL, et al. Overview of Electronic Nicotine Delivery Systems:  
18 A Systematic Review. *Am J Prev Med*2017Feb;52(2):e33-e66.  
19  
20 31. Barraza LF, Weidenaar KE, Cook LT, et al. Regulations and policies regarding e-cigarettes.  
21 *Cancer*2017Aug 15;123(16):3007-3014.  
22  
23  
24 32. Thompson-Haile A, Bredin C, Leatherdale S. Rationale for using an Active-Information  
25 Passive-Consent Permission Protocol in COMPASS. 2013;COMPASS Technical Report Series  
26 volume 1.  
27  
28  
29  
30  
31  
32  
33  
34  
35  
36  
37  
38  
39  
40  
41  
42  
43  
44  
45  
46  
47  
48  
49  
50  
51  
52  
53  
54  
55  
56  
57  
58  
59  
60

1  
2  
3  
4  
5  
6  
7  
8  
9  
10  
11  
12  
13  
14  
15  
16  
17  
18  
19  
20  
21  
22  
23  
24  
25  
26  
27  
28  
29  
30  
31  
32  
33  
34  
35  
36  
37  
38  
39  
40  
41  
42  
43  
44  
45  
46  
47  
48  
49  
50  
51  
52  
53  
54  
55  
56  
57  
58  
59  
60

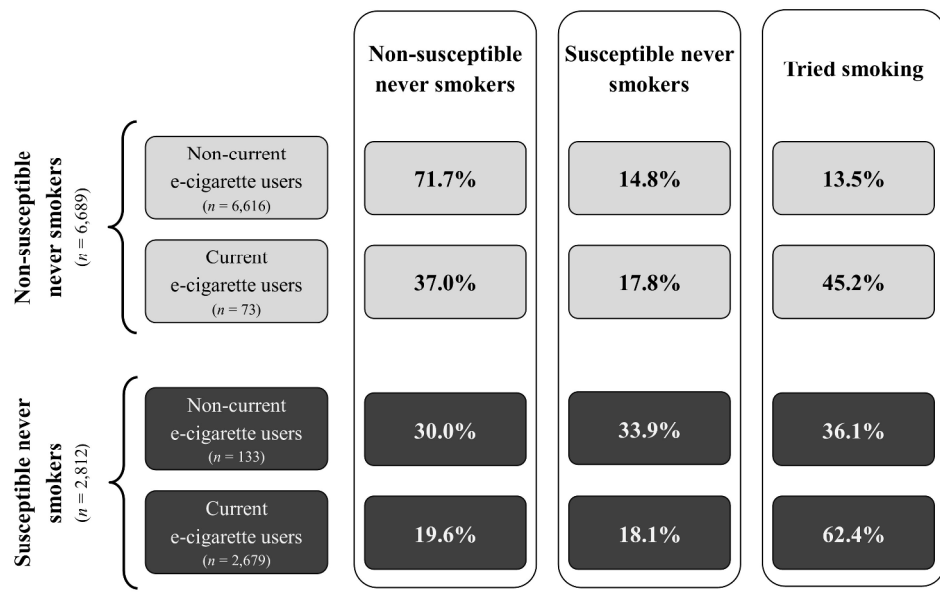

Figure 1: Smoking status of current and non-current e-cigarette users among baseline non-susceptible and susceptible never smokers, 2013-2016 COMPASS study

279x215mm (300 x 300 DPI)

View only

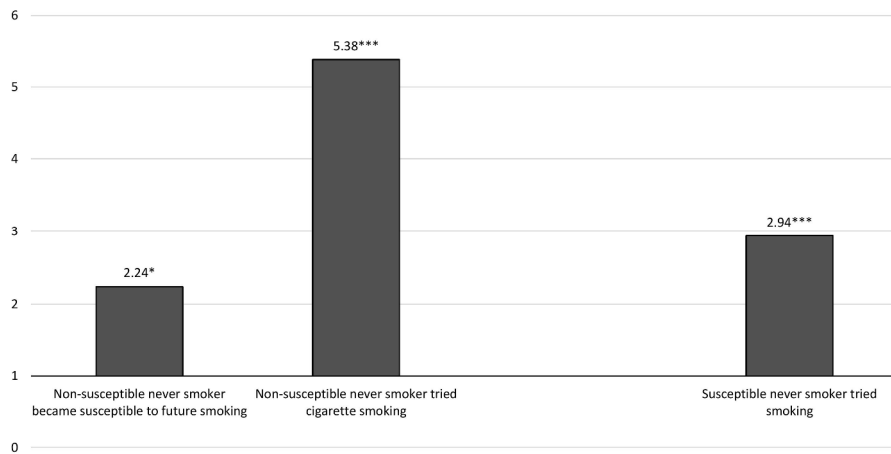

Note: Logistic regression models controlled for gender, grade, self-reported ethnicity, the number of friends that smoke cigarettes at baseline and student-level clustering within schools.

\* p<0.05; \*\* p<0.01; \*\*\* p<0.001

Figure 3. Adjusted odds ratio estimate of becoming susceptible to future smoking and trying tobacco cigarette smoking at follow-up among baseline non-susceptible and susceptible never smokers, 2013-2016 COMPASS study

Figure 2: Adjusted odds ratio estimate of becoming susceptible to future smoking and trying tobacco cigarette smoking at follow-up among baseline non-susceptible and susceptible never smokers, 2013-2016 COMPASS study

279x215mm (300 x 300 DPI)

only

**STROBE 2007 (v4) Statement—Checklist of items that should be included in reports of *cohort studies***

| Section/Topic                | Item # | Recommendation                                                                                                                                                                       | Reported on page # |
|------------------------------|--------|--------------------------------------------------------------------------------------------------------------------------------------------------------------------------------------|--------------------|
| Title and abstract           | 1      | (a) Indicate the study's design with a commonly used term in the title or the abstract                                                                                               | 1- 2               |
|                              |        | (b) Provide in the abstract an informative and balanced summary of what was done and what was found                                                                                  | 2                  |
| <b>Introduction</b>          |        |                                                                                                                                                                                      |                    |
| Background/rationale         | 2      | Explain the scientific background and rationale for the investigation being reported                                                                                                 | 3-5                |
| Objectives                   | 3      | State specific objectives, including any prespecified hypotheses                                                                                                                     | 4-5                |
| <b>Methods</b>               |        |                                                                                                                                                                                      |                    |
| Study design                 | 4      | Present key elements of study design early in the paper                                                                                                                              | 5                  |
| Setting                      | 5      | Describe the setting, locations, and relevant dates, including periods of recruitment, exposure, follow-up, and data collection                                                      | 5-6                |
| Participants                 | 6      | (a) Give the eligibility criteria, and the sources and methods of selection of participants. Describe methods of follow-up                                                           | 5-6                |
|                              |        | (b) For matched studies, give matching criteria and number of exposed and unexposed                                                                                                  | N/A                |
| Variables                    | 7      | Clearly define all outcomes, exposures, predictors, potential confounders, and effect modifiers. Give diagnostic criteria, if applicable                                             | 6-7                |
| Data sources/<br>measurement | 8*     | For each variable of interest, give sources of data and details of methods of assessment (measurement). Describe comparability of assessment methods if there is more than one group | 6- 7               |
| Bias                         | 9      | Describe any efforts to address potential sources of bias                                                                                                                            | 5, 10              |
| Study size                   | 10     | Explain how the study size was arrived at                                                                                                                                            | 5-6                |
| Quantitative variables       | 11     | Explain how quantitative variables were handled in the analyses. If applicable, describe which groupings were chosen and why                                                         | 7                  |
| Statistical methods          | 12     | (a) Describe all statistical methods, including those used to control for confounding                                                                                                | 7                  |
|                              |        | (b) Describe any methods used to examine subgroups and interactions                                                                                                                  | 7                  |
|                              |        | (c) Explain how missing data were addressed                                                                                                                                          | 6                  |
|                              |        | (d) If applicable, explain how loss to follow-up was addressed                                                                                                                       | 6                  |
|                              |        | (e) Describe any sensitivity analyses                                                                                                                                                | N/A                |
| <b>Results</b>               |        |                                                                                                                                                                                      |                    |

|                          |     |                                                                                                                                                                                                              |      |
|--------------------------|-----|--------------------------------------------------------------------------------------------------------------------------------------------------------------------------------------------------------------|------|
| Participants             | 13* | (a) Report numbers of individuals at each stage of study—eg numbers potentially eligible, examined for eligibility, confirmed eligible, included in the study, completing follow-up, and analysed            | 5-6  |
|                          |     | (b) Give reasons for non-participation at each stage                                                                                                                                                         | 5-6  |
|                          |     | (c) Consider use of a flow diagram                                                                                                                                                                           | N/A  |
| Descriptive data         | 14* | (a) Give characteristics of study participants (eg demographic, clinical, social) and information on exposures and potential confounders                                                                     | 7-8  |
|                          |     | (b) Indicate number of participants with missing data for each variable of interest                                                                                                                          | 5-6  |
|                          |     | (c) Summarise follow-up time (eg, average and total amount)                                                                                                                                                  | N/A  |
| Outcome data             | 15* | Report numbers of outcome events or summary measures over time                                                                                                                                               | 7-8  |
| Main results             | 16  | (a) Give unadjusted estimates and, if applicable, confounder-adjusted estimates and their precision (eg, 95% confidence interval). Make clear which confounders were adjusted for and why they were included | 7-8  |
|                          |     | (b) Report category boundaries when continuous variables were categorized                                                                                                                                    | N/A  |
|                          |     | (c) If relevant, consider translating estimates of relative risk into absolute risk for a meaningful time period                                                                                             | N/A  |
| Other analyses           | 17  | Report other analyses done—eg analyses of subgroups and interactions, and sensitivity analyses                                                                                                               | N/A  |
| <b>Discussion</b>        |     |                                                                                                                                                                                                              |      |
| Key results              | 18  | Summarise key results with reference to study objectives                                                                                                                                                     | 7-8  |
| <b>Limitations</b>       |     |                                                                                                                                                                                                              |      |
| Interpretation           | 20  | Give a cautious overall interpretation of results considering objectives, limitations, multiplicity of analyses, results from similar studies, and other relevant evidence                                   | 8-11 |
| Generalisability         | 21  | Discuss the generalisability (external validity) of the study results                                                                                                                                        | 10   |
| <b>Other information</b> |     |                                                                                                                                                                                                              |      |
| Funding                  | 22  | Give the source of funding and the role of the funders for the present study and, if applicable, for the original study on which the present article is based                                                | 12   |

\*Give information separately for cases and controls in case-control studies and, if applicable, for exposed and unexposed groups in cohort and cross-sectional studies.

**Note:** An Explanation and Elaboration article discusses each checklist item and gives methodological background and published examples of transparent reporting. The STROBE checklist is best used in conjunction with this article (freely available on the Web sites of PLoS Medicine at <http://www.plosmedicine.org/>, Annals of Internal Medicine at <http://www.annals.org/>, and Epidemiology at <http://www.epidem.com/>). Information on the STROBE Initiative is available at [www.strobe-statement.org](http://www.strobe-statement.org).

# BMJ Open

## Risky Business: A longitudinal study examining cigarette smoking initiation among susceptible and non-susceptible e-cigarette users in Canada

|                                 |                                                                                                                                                                                                                                                                                                                                             |
|---------------------------------|---------------------------------------------------------------------------------------------------------------------------------------------------------------------------------------------------------------------------------------------------------------------------------------------------------------------------------------------|
| Journal:                        | <i>BMJ Open</i>                                                                                                                                                                                                                                                                                                                             |
| Manuscript ID                   | bmjopen-2017-021080.R1                                                                                                                                                                                                                                                                                                                      |
| Article Type:                   | Research                                                                                                                                                                                                                                                                                                                                    |
| Date Submitted by the Author:   | 03-Apr-2018                                                                                                                                                                                                                                                                                                                                 |
| Complete List of Authors:       | Aleyan, Sarah; University of Waterloo School of Public Health and Health Systems<br>Cole, Adam; University of Waterloo School of Public Health and Health Systems<br>Qian, Wei; University of Waterloo School of Public Health and Health Systems<br>Leatherdale, Scott ; University of Waterloo School of Public Health and Health Systems |
| <b>Primary Subject Heading</b>: | Smoking and tobacco                                                                                                                                                                                                                                                                                                                         |
| Secondary Subject Heading:      | Public health, Smoking and tobacco                                                                                                                                                                                                                                                                                                          |
| Keywords:                       | e-cigarettes, cigarettes, youth, adolescents, susceptibility                                                                                                                                                                                                                                                                                |
|                                 |                                                                                                                                                                                                                                                                                                                                             |

SCHOLARONE™  
Manuscripts

Only



1  
2  
3 Risky Business: A longitudinal study examining cigarette smoking initiation  
4  
5  
6 among susceptible and non-susceptible e-cigarette users in Canada  
7  
8

9 Sarah Aleyan, MSc<sup>1</sup>

10 Adam Cole, MSc<sup>1</sup>

11 Wei Qian, PhD<sup>1</sup>

12 Scott T. Leatherdale, PhD<sup>1</sup>

13 1-School of Public Health and Health Systems, University of Waterloo, Ontario  
14  
15  
16  
17  
18

19 Please send correspondence and reprints to:

20 Sarah Aleyan, MSc

21 School of Public Health and Health Systems

22 University of Waterloo

23 200 University Avenue

24 Waterloo, ON

25 Canada

26 N2L 3G1  
27  
28  
29  
30  
31  
32  
33  
34  
35

36 Phone: (519) 888-4567

37 Fax: (519) 746-2510

38 E-mail: [saleyan@uwaterloo.ca](mailto:saleyan@uwaterloo.ca)

39  
40  
41 Word Count: 2997 words  
42  
43  
44  
45  
46  
47  
48  
49  
50  
51  
52  
53  
54  
55  
56  
57  
58  
59  
60

**ABSTRACT:**

**Objectives:** Given that many adolescent e-cigarette users are never smokers, the possibility that e-cigarettes may act as a gateway to future cigarette smoking has been discussed in various studies. Longitudinal data are needed to explore the pathway between e-cigarette and cigarette use, particularly among different risk groups including susceptible and non-susceptible never smokers. The objective of this study was to examine whether baseline use of e-cigarettes among a sample of never-smoking youth predicted cigarette smoking initiation over a two-year period.

**Design:** Longitudinal cohort study

**Setting:** 89 high schools across Ontario and Alberta, Canada.

**Participants:** A sample of gr. 9-11 never-smoking students at baseline (n=9501) that participated in the COMPASS study over two years.

**Primary and Secondary Outcome Measures:** Participants completed in-class questionnaires that assessed smoking susceptibility and smoking initiation.

**Results:** Among the baseline sample of non-susceptible never-smokers, 45.2% of current e-cigarette users reported trying a cigarette after two years compared to 13.5% of non-current e-cigarette users. Among the baseline sample of susceptible never-smokers, 62.4% of current e-cigarette users reported trying a cigarette after two years compared to 36.1 % of non-current e-cigarette users. Overall, current e-cigarette users were more likely to try a cigarette 2 years later. This association was stronger among the sample of non-susceptible never smokers (AOR = 5.28, 95 % CI 2.81 to 9.94;  $p < 0.0001$ ) compared to susceptible never smokers (AOR= 2.78, 95 % CI 1.84 to 4.20;  $p < 0.0001$ ).

**Conclusions:** Findings from this large, longitudinal study support public health concerns that e-cigarette use may contribute to the development of a new population of cigarette smokers. They also support the notion that e-cigarettes are expanding the tobacco market by attracting low-risk youth who would otherwise be unlikely to initiate using cigarettes. Careful consideration will be needed in developing an appropriate regulatory framework that prevents e-cigarette use among youth.

**Keywords:** *e-cigarettes, cigarettes, youth, adolescents, susceptibility*

**Strengths and Limitations of this study:**

- This study assessed the relationship between e-cigarette use among never-smoking adolescents and smoking initiation using a large longitudinal sample.
- This study examined transitions in smoking behaviour among adolescents at different risk levels (i.e. susceptible and non-susceptible never smokers).
- The measures of e-cigarette use used within this study did not provide information regarding the types of e-cigarettes being used.
- This study focused solely on cigarette smoking initiation outcomes.

**BACKGROUND**

Despite the declining prevalence of smoking in most countries globally, tobacco use remains a threat to global health. In 2013, tobacco use accounted for the loss of approximately 6.1 million lives and 143.5 million disability-adjusted life-years (DALYs) world-wide [1-2]. Considering that the majority of smokers try their first cigarette during adolescence [3], preventing youth smoking initiation represents a key public health priority.

Electronic cigarettes are battery-operated devices that deliver nicotine and vaporize a liquid mixture made up of propylene glycol, nicotine, flavouring agents and other constituents. The rise in e-cigarette use among youth has created discussion regarding the public health implications. While some evidence does exist to support the potential of e-cigarettes to be used as smoking cessation aids and help reduce smoking-related harms among adults [4,5], others

1  
2  
3 have argued against this considering the limited evidence of the long-term effects of e-cigarettes  
4 [6]. On the other hand, given that many adolescent e-cigarette users are never smokers [7-8], the  
5  
6 possibility that e-cigarette use may attract new cigarette smokers among youth populations has  
7  
8 been discussed in various studies [5,9-10]. A recent meta-analysis by Soneji et al. (2017) found  
9  
10 consistent evidence from 9 longitudinal studies of an association between initial e-cigarette use  
11  
12 among non-smoking adolescents and adults and subsequent cigarette smoking initiation [11].  
13  
14 Despite substantial evidence supporting this association [11], most longitudinal studies to date  
15  
16 examining this relationship have been based out of the U.S., with an absence of studies assessing  
17  
18 whether this pattern also exists within a Canadian context, where the regulatory environment for  
19  
20 e-cigarettes differs from the U.S. Within Canada, nicotine e-cigarettes are considered medical  
21  
22 devices requiring market authorization before advertisement or sale. Currently, no e-cigarettes  
23  
24 with nicotine have received market approval in Canada. It is important to consider whether  
25  
26 Canada's distinct regulatory policies that limit the sale of nicotine-containing e-cigarettes may  
27  
28 have an impact on the relationship between adolescent e-cigarette use and subsequent cigarette  
29  
30 smoking initiation.  
31  
32  
33  
34  
35  
36  
37

38  
39       Though substantial evidence exists to support the association between e-cigarette use and  
40  
41 subsequent smoking initiation [11], few studies to date have assessed the differential association  
42  
43 between e-cigarette use and subsequent smoking initiation among distinct risk groups, including  
44  
45 non-susceptible never smokers (i.e., low risk) versus susceptible never smokers (i.e., high risk).  
46  
47 Susceptibility to future smoking, defined as the lack of a firm commitment not to smoke among  
48  
49 never smokers, is a validated and reliable predictor of tobacco cigarette smoking initiation  
50  
51 among adolescents [12-13]. It is hypothesized that the use of e-cigarettes by never-smoking  
52  
53 youth may increase their susceptibility to future cigarette smoking. Cross-sectional studies  
54  
55  
56  
57  
58  
59  
60

1  
2  
3 suggest that never smoking youth that have ever and currently use e-cigarettes are at increased  
4 odds of being susceptible to future smoking, with a stronger association identified among  
5 younger students [14-16]. To our knowledge, only two longitudinal studies have examined the  
6 progression from non-susceptible never smoker to susceptible never smoker or ever smoker  
7 among e-cigarette and non-e-cigarette users; however, both studies included older adolescent and  
8 young adult populations. The first longitudinal study identified that youth and young adult non-  
9 susceptible never smokers that used e-cigarettes at baseline were more likely to become  
10 susceptible never smokers and try smoking cigarettes at 1 year follow-up, compared to those  
11 who did not smoke e-cigarettes at baseline [17]. The second longitudinal study identified that  
12 among a sample of older adolescents, non-susceptible never smokers that used e-cigarettes at  
13 baseline were more likely to initiate cigarette smoking after 16 months, compared to never users  
14 of e-cigarettes at baseline [18].

15  
16  
17  
18  
19  
20  
21  
22  
23  
24  
25  
26  
27  
28  
29  
30  
31 Previous longitudinal studies assessing the potential association between e-cigarette use  
32 and subsequent cigarette smoking initiation among non-smoking youth have focused on older  
33 adolescents and young adults and generally had shorter follow-up periods [17-18]. These studies  
34 have also all taken place in the United States. Additional longitudinal work incorporating a  
35 sample of younger adolescents, a longer follow-up period, and different regulatory contexts is  
36 needed to explore the potential association between e-cigarette use and subsequent cigarette use  
37 among different risk groups and in different contexts. This study examined whether baseline use  
38 of e-cigarettes among a Canadian sample of susceptible and non-susceptible never-smoking  
39 youth was associated with cigarette smoking initiation over a two-year follow-up.  
40  
41  
42  
43  
44  
45  
46  
47  
48  
49  
50  
51  
52  
53  
54  
55  
56  
57  
58  
59  
60

## METHODS

### Design

COMPASS is a prospective cohort study (2012-2021) designed to gather longitudinal and hierarchical data from a sample of secondary school students in Canada [19]. This paper reports on longitudinal findings between Year 2 (2013-2014) and Year 4 (2015-2016) of the study among a sample of schools that agreed to the use of active-information passive consent permission procedures. Year 2 data were selected as baseline due to the larger sample size [20] and since this was the first year e-cigarette use was assessed. Data relating to student health behaviours were collected using the COMPASS student questionnaire (Cq). A full description of the COMPASS study along with its methods is available online ([www.compass.uwaterloo.ca](http://www.compass.uwaterloo.ca)) and in print [19]. The University of Waterloo Research Ethics Board along with participating school board review panels approved all procedures used.

### Participants

In Year 2, data were gathered from 45,298 grade 9 to 12 students (response rate of 79.2%) attending 89 secondary schools located within the Canadian provinces of Ontario and Alberta. In Year 4, data were gathered from 40,436 grade 9 to 12 secondary students (response rate of 79.9 %) attending 81 Ontario and Alberta secondary schools. The vast majority of missing respondents were a result of students being absent or on a spare (i.e., scheduled free period) during the data collection period; missing respondents due to parental refusal was limited (~0.4 %).

## Data Linkage

To examine longitudinal changes among individuals, we linked student responses at Year 2 and Year 4 using a unique code generated by each student [21]. The process of linking student-level data across multiple waves is described in greater depth by Qian and colleagues [22]. The linked sample consisted of students that could be followed across both time points. As such, it was not possible to link grade 11 and 12 students in Year 2 that had already graduated and grade 9 and 10 students that were newly admitted to high school in Year 4. A total of 11,215 students who were in grades 9, 10 and 11 at Year 2 could be linked across both time points. Grade 11 students within the linked sample represented students who had not graduated high school with their peers and as such were able to participate in the study at both time points. Furthermore, students who reported ever having tried a cigarette at baseline (n=1,527) or who had missing data for any predictors/covariates (n=187) were excluded, leaving a final linked sample of 9,501 students. For ease of description, Year 2 will be considered “baseline” and Year 4 will be considered “follow-up”.

## Measures

Smoking initiation at baseline and follow-up was assessed by asking students: “Have you ever tried smoking a cigarette, even a puff or two?” Individuals who responded “yes” were classified as ever-smokers, while all others were classified as never smokers. We further classified the “never smokers” group as susceptible or non-susceptible to future smoking. Susceptibility to future smoking among never smoking students was assessed at baseline and follow-up using a three-item validated measure: “Do you think in the future you might try

1  
2  
3 smoking cigarettes?”, “If one of your best friends were to offer you a cigarette, would you smoke  
4 it?”, and “At any time during the next year, do you think you will smoke a cigarette?” Consistent  
5  
6 with Pierce’s validated construct [12], individuals who responded “definitely not” to all three  
7  
8 questions were categorized as non-susceptible to future smoking (i.e., low risk). Individuals who  
9  
10 responded positively to at least one item were categorized as susceptible to future smoking (i.e.,  
11  
12 high risk).  
13  
14  
15

16  
17  
18 Current (past 30 day) use of e-cigarettes at baseline was measured by asking students the  
19  
20 following question: “In the last 30 days, did you use any of the following? (Mark all that apply)”.  
21  
22 Students could choose one or more tobacco/nicotine products, including e-cigarettes (“electronic  
23  
24 cigarettes that look like cigarettes/cigars, but produce vapour instead of smoke”). Respondents  
25  
26 who reported having used e-cigarettes in the past 30 days were categorized as current e-cigarette  
27  
28 users, while all others were categorized as non-current users.  
29  
30  
31

32  
33 Students also self-reported their gender (male or female), grade (9, 10, 11, 12) and  
34  
35 ethnicity (Black, White, Asian, Latin-American, Aboriginal, Other/Mixed) at baseline. Students’  
36  
37 social environment was measured by asking “How many of your closest friends smoke  
38  
39 cigarettes?” (“None” to “5 or more friends”) at baseline. Students’ weekly spending money at  
40  
41 baseline was also measured by asking “About how much money do you usually get each week to  
42  
43 spend on yourself or to save?” with response options of zero, \$1 to \$5, \$6 to \$10, \$11 to \$20, \$21  
44  
45 to \$40, \$41 to \$100, more than \$100 and “I do not know how much I get each week”.  
46  
47  
48

### 49 **Patient and Public Involvement**

50  
51  
52 There were no patients involved in the development of the research questions and outcome  
53  
54 measures, the design of the study or the recruitment to and conduct of the study.  
55  
56  
57



## ANALYSES

Descriptive statistics were used to examine changes in self-reported susceptibility to future smoking at follow-up among never smokers, stratifying by e-cigarette use and cigarette smoking susceptibility at baseline. Descriptive statistics examined the baseline characteristics of current and non-current e-cigarette users; chi-square tests identified differences between current and non-current e-cigarette users at baseline.

For longitudinal analyses, the PROC GENMOD procedure (present on SAS 9.4) was used to fit Generalized Estimating Equation (GEE) models using the repeated statement. GEE models are an extension of generalized linear models that allow for the analysis of correlated observations (i.e., students clustered within schools) [23]. Using GEE, two logistic regression models assessed the relationship between baseline e-cigarette use and smoking susceptibility at follow-up, stratifying by smoking susceptibility at baseline. The first, a multinomial logistic regression model, assessed whether e-cigarette use among non-susceptible (i.e., low-risk) youth at baseline predicted susceptibility to future smoking and smoking initiation at follow-up. The second, a binary logistic regression model, assessed whether e-cigarette use among susceptible (i.e., high-risk) youth at baseline predicted smoking initiation at follow-up. Both models controlled for gender, grade, self-reported ethnicity, self-reported spending money and the number of friends that smoke cigarettes at baseline, as these covariates have been seen to influence smoking susceptibility outcomes. The alpha level used for all statistical analyses was 0.05.

## RESULTS

Table 1 presents the baseline characteristics of current and non-current e-cigarette users. At baseline, a significantly higher proportion of current (past-30 day) e-cigarette users reported being male, relative to those who had not used e-cigarettes in the past 30 days. A significantly higher proportion of current e-cigarette users also reported having friends that smoked cigarettes and reported being susceptible to smoking cigarettes in the future, relative to those who had not used e-cigarettes in the past 30 days.

Table 1. Baseline characteristics of current and non-current e-cigarette users among students that reported never smoking cigarettes at baseline, 2013-2016 COMPASS study

| Variable                                   |                         | Current (Past-30 day) E-cigarette Users |             | Chi-square |         |
|--------------------------------------------|-------------------------|-----------------------------------------|-------------|------------|---------|
|                                            |                         | No (n=9295)                             | Yes (n=206) | df         | p-value |
| Grade                                      | 9                       | 54.8 ( 5098)                            | 51.5 ( 106) | 2          | 0.6117  |
|                                            | 10                      | 42.2 ( 3923)                            | 45.6 ( 94)  |            |         |
|                                            | 11                      | 2.9 ( 274)                              | 2.9 ( 6)    |            |         |
| Gender                                     | Female                  | 52.6 ( 4889)                            | 37.9 ( 78)  | 1          | <.0001  |
|                                            | Male                    | 47.4 ( 4406)                            | 62.1 ( 128) |            |         |
| Race                                       | White                   | 70.9 ( 6590)                            | 65.0 ( 134) | 5          | 0.0015  |
|                                            | Black                   | 2.6 ( 239)                              | 4.9 ( 10)   |            |         |
|                                            | Asian                   | 4.7 ( 440)                              | 1.0 ( 2)    |            |         |
|                                            | Off-Reserve Aboriginal  | 0.9 ( 83)                               | 1.9 ( 4)    |            |         |
|                                            | Hispanic/Latin American | 1.0 ( 97)                               | 2.4 ( 5)    |            |         |
|                                            | Other/Mixed             | 19.9 ( 1846)                            | 24.8 ( 51)  |            |         |
| Number of friends that smoke cigarettes    | None                    | 81.7 ( 7594)                            | 63.6 ( 131) | 3          | <.0001  |
|                                            | 1                       | 10.7 ( 997)                             | 19.4 ( 40)  |            |         |
|                                            | 2                       | 4.4 ( 408)                              | 8.7 ( 18)   |            |         |
|                                            | 3 or more               | 3.2 ( 296)                              | 8.3 ( 17)   |            |         |
| Susceptibility to future cigarette smoking | Not susceptible         | 71.2 ( 6616)                            | 35.4 ( 73)  | 1          | <.0001  |
|                                            | Susceptible             | 28.8 ( 2679)                            | 64.6 ( 133) |            |         |
| Weekly Spending Money                      | Zero                    | 21.8 (2022)                             | 11.2 (23)   | 4          | <0.0001 |
|                                            | \$1-20                  | 38.6 (3584)                             | 36.9 (76)   |            |         |
|                                            | \$21-100                | 20.4 (1898)                             | 29.1 (60)   |            |         |

|  |                                                        |             |           |  |  |
|--|--------------------------------------------------------|-------------|-----------|--|--|
|  | More than \$100                                        | 4.9 (454)   | 9.7 (20)  |  |  |
|  | I don't know how much money I get each week/Not stated | 14.1 (1337) | 13.1 (27) |  |  |

Figure 1 presents the smoking status at follow-up among baseline never-smokers of tobacco cigarettes. The results are stratified by e-cigarette use and cigarette smoking susceptibility at baseline. Among non-susceptible never smokers, it is apparent that a higher proportion of current e-cigarette users reported trying tobacco cigarettes at follow-up compared to those who did not report using e-cigarettes in the past 30 days; roughly half of current e-cigarette users at baseline proceeded to trying a cigarette at follow-up. Similarly, among susceptible never smokers, a larger proportion of current e-cigarette users reported trying cigarette smoking at follow-up compared to those who did not report using e-cigarettes in the past 30 days.

Figure 2 presents the adjusted odds of being susceptible to future smoking or trying cigarette smoking at follow-up among susceptible and non-susceptible current e-cigarette users at baseline (relative to non-current users). After controlling for relevant covariates, non-susceptible current e-cigarette users at baseline were significantly more likely to become susceptible to future smoking and try cigarette smoking at follow-up relative to non-current e-cigarette users. Similarly, susceptible current e-cigarette users at baseline were significantly more likely to try cigarette smoking at follow-up relative to non-current e-cigarette users.

## DISCUSSION

Within the sample of never cigarette smokers at baseline, this study found that current e-cigarette users were at a higher risk of cigarette smoking initiation after a two-year follow-up

1  
2  
3 period. These findings were consistent with previous studies that have demonstrated that  
4  
5 adolescents with a history of e-cigarette use were at greater risk for future cigarette use compared  
6  
7 to non-users of e-cigarettes [10, 14]. Of concern, the observed association between e-cigarette  
8  
9 use and smoking initiation was even stronger among individuals that were not susceptible to  
10  
11 future smoking (i.e., low risk). These results support public health concerns that electronic  
12  
13 cigarette use may contribute towards the development of a new population of cigarette smokers  
14  
15 [14, 17], even among adolescents at low risk of future smoking experimentation.  
16  
17  
18  
19

20 The study findings demonstrated that only a small percentage of non-smoking students  
21  
22 reported using e-cigarettes in the past 30 days (4.0 %). The small proportion of e-cigarette users  
23  
24 may be interpreted as unlikely to result in large effects when assessing public health harms  
25  
26 brought on by non-smoking youth that transition from using e-cigarettes to traditional cigarettes.  
27  
28 However, it should be noted that prior work has demonstrated that a substantial number of  
29  
30 Canadian youth have tried using e-cigarettes and that never smokers comprise the largest  
31  
32 population of youth [24-25]. Furthermore, our findings clearly demonstrate that never smokers  
33  
34 that reported using e-cigarettes in the past 30 days were at an increased risk of transitioning to  
35  
36 cigarette smoking after two years. As such, continued surveillance and monitoring of e-cigarette  
37  
38 use and its relationship with cigarette smoking among youth populations should be considered a  
39  
40 public health priority.  
41  
42  
43  
44  
45

46 The use of e-cigarettes by non-susceptible never smoking youth may be explained in part  
47  
48 by the availability of appealing flavouring agents including candy or fruit-flavours. Currently,  
49  
50 there are over 7000 distinct flavours available for the e-liquid solutions used in e-cigarettes [26].  
51  
52 A recent review identified that the preference for sweetened tobacco products was higher among  
53  
54 youth than adult populations [27]. Previous research has also shown the growing appeal of  
55  
56  
57  
58  
59  
60

1  
2  
3 flavoured tobacco products among Canadian adolescents [28]. Banning e-cigarette flavours may  
4  
5 be an important step to reduce the appeal of these products to youth.  
6  
7

8  
9         Additionally, e-cigarette promotion has proliferated through a number of channels  
10 including billboards, radio, television advertising, celebrity endorsement and online media  
11 platforms [29-30]. It may be that the widespread promotion of these products have had  
12  
13 unintended consequences of re-normalizing cigarette smoking and shifting social norms  
14  
15 surrounding smoking, especially among low risk youth populations [31-32]. These marketing  
16  
17 strategies may undermine wider tobacco control policies by inadvertently promoting smoking.  
18  
19  
20  
21  
22

23  
24         Although some evidence exists to support the notion that e-cigarettes may be a less  
25 harmful alternative to cigarette smoking [33], it is also important to simultaneously consider the  
26  
27 potential for harm creation among a population of non-smoking youth who would not have  
28  
29 normally considered trying tobacco cigarettes. E-cigarettes may potentially lead to a rise in  
30  
31 cigarette smoking initiation rates, if youth who would not have otherwise tried smoking begin  
32  
33 experimenting with e-cigarettes and then transition to using cigarettes and other tobacco products  
34  
35 [6]. In addition to the harms associated with transitioning to traditional cigarettes, it is also  
36  
37 important to consider the health risks nicotine-containing e-cigarettes pose to youth, as nicotine  
38  
39 has been seen to alter the developing adolescent brain [34-35]. Our findings reinforce the need  
40  
41 for a comprehensive approach that addresses all forms of tobacco products in youth-focused  
42  
43 prevention efforts, moving forward.  
44  
45  
46  
47  
48

49  
50         The findings from this study hold important implications at a time when regulation  
51 surrounding the sales and promotion of e-cigarettes is either being tabled or passed in various  
52  
53 jurisdictions [36]. For instance, within Canada, Bill S-5 will aim to regulate the manufacturing,  
54  
55 sale, labelling and promotion of e-cigarettes. Some of the measures within this Bill include  
56  
57  
58  
59  
60

1  
2  
3 banning the sale of vaping products to Canadians under the age of 18, restricting the promotion  
4 of flavours that are appealing among youth populations (e.g., dessert flavours) and limiting  
5 promotional activities that would be considered appealing to youth. Our findings lend support to  
6 the need for appropriate regulations that will reduce the appeal of e-cigarettes and discourage use  
7 among non-smoking youth.  
8  
9  
10  
11  
12  
13

14  
15 The study has various strengths including the use of a large, longitudinal, school-based  
16 sample from two Canadian jurisdictions, Ontario and Alberta. This is one of the few studies  
17 documenting the transition from e-cigarette use to cigarette smoking initiation among a non-U.S.  
18 sample of non-smoking youth, illustrating that this pattern of behaviour is not specific to U.S.  
19 adolescents. Another key strength of this study included the use of passive consent procedures,  
20 which reduces the chances of producing a biased sample and increases participation rates [37].  
21  
22 However, the study is also subject to some limitations. First, the study used non-probability  
23 sampling methods and as such was not representative of all Ontario and Alberta high schools  
24 [19]. As such, these findings may not be generalizable to other Canadian high schools outside of  
25 the study sample. Second, the study was not able to assess the reasons behind e-cigarette use  
26 among the baseline sample of current e-cigarette users, as this question was only introduced in  
27 Year 4 of COMPASS (2015-2016). However, future longitudinal work may assess the main  
28 reasons driving youth e-cigarette use. In addition, the measures of e-cigarette use did not provide  
29 any information about the types of e-cigarettes used (e.g. flavoured/non-flavoured, with/without  
30 nicotine, mod/tank). Thus, associations between specific kinds of e-cigarettes and cigarette  
31 smoking initiation could not be examined. Lastly, this study focused solely on cigarette smoking  
32 initiation; future research should focus on examining other outcomes (e.g. smoking progression)  
33  
34  
35  
36  
37  
38  
39  
40  
41  
42  
43  
44  
45  
46  
47  
48  
49  
50  
51  
52  
53  
54  
55  
56  
57  
58  
59  
60

1  
2  
3 and also examine relationships between e-cigarette use and initiation of other tobacco products  
4  
5 (e.g. cigars, cigarillos) among different risk groups.  
6  
7

## 8 **CONCLUSIONS**

9

10  
11 Among non-smoking youth that were current e-cigarette users, our findings showed an  
12 increased risk of progressing to cigarette use after two years. Of concern, low-risk youth at  
13 baseline were at an even greater risk of cigarette smoking initiation at follow-up. These results  
14 suggest that e-cigarettes are expanding the tobacco cigarette market by attracting low-risk youth  
15 who would not have otherwise tried using cigarettes. These findings reinforce the need to adopt  
16 regulations aimed at reducing the appeal of e-cigarettes and deterring use among youth  
17 populations. Additionally, our results point towards the need for sustained efforts focused on  
18 deterring the use of all forms of tobacco products, including e-cigarettes.  
19  
20  
21  
22  
23  
24  
25  
26  
27  
28  
29  
30  
31  
32  
33  
34  
35  
36  
37  
38  
39  
40  
41  
42  
43  
44  
45  
46  
47  
48  
49  
50  
51  
52  
53  
54  
55  
56  
57  
58  
59  
60

1  
2  
3  
4  
5  
6  
7  
8  
9  
10  
11  
12  
13  
14  
15 Figure 1: Smoking status of current and non-current e-cigarette users among baseline non-  
16 susceptible and susceptible never smokers, 2013-2016 COMPASS study  
17  
18  
19  
20  
21  
22

23 Figure 2: Adjusted odds ratio estimate of becoming susceptible to future smoking and trying  
24 tobacco cigarette smoking at follow-up among baseline non-susceptible and susceptible never  
25 smokers, 2013-2016 COMPASS study  
26  
27  
28  
29  
30  
31  
32  
33

34 **Contributors:** SL designed the study. SA and AC formulated the research objectives and plan.  
35 Analysis of data was performed by WQ. SA and AC prepared the manuscript. All authors made  
36 revisions to the original draft and approved the final submitted version.  
37

38 **Conflict of Interest:** The authors declare they have no conflicts of interest.  
39  
40

41 **Funding:** The COMPASS study was supported by a bridge grant from the Canadian Institutes of  
42 Health Research (CIHR) Institute of Nutrition, Metabolism and Diabetes through the “Obesity –  
43 Interventions to Prevent or Treat” priority funding awards (OOP-110788; grant awarded to S.  
44 Leatherdale) and an operating grant from the CIHR Institute of Population and Public Health  
45 (IPPH) (MOP-114875; grant awarded to S. Leatherdale). Dr. Leatherdale is a  
46 Chair in Applied Public Health funded by the Public Health Agency of Canada in partnership  
47 with CIHR. Adam Cole is funded by CIHR.  
48  
49

50 **Ethics Approval:** Ethics approval was received by the University of Waterloo’s Office of  
51 Research Ethics and all participating school boards’ research ethics bodies.  
52

53 **Data sharing:** COMPASS data is stored at the University of Waterloo on a secure server. The  
54 principal investigator of COMPASS, Dr. Leatherdale, maintains ownership of all COMPASS  
55 data, and will grant access to COMPASS research collaborators, external research groups and  
56  
57



1  
2  
3 students. For researchers looking to gain access to COMPASS data, individuals must  
4 successfully complete the COMPASS data usage application form, that is available online  
5 (<https://uwaterloo.ca/compass-system/information-researchers> ), which is then reviewed and  
6 approved/declined by Dr. Leatherdale.  
7  
8  
9  
10  
11  
12  
13  
14

## 15 REFERENCES

- 16  
17 1. GBD 2015 Risk Factors Collaborators. Global, regional, and national comparative risk  
18 assessment of 79 behavioural, environmental and occupational, and metabolic risks or clusters of  
19 risks, 1990-2015: a systematic analysis for the Global Burden of Disease Study 2015.  
20 *Lancet* 2016 Oct 8;388(10053):1659-1724.  
21  
22
- 23 2. World Health Organization. Global Status Report on noncommunicable diseases 2014. 2014.  
24
- 25 3. U.S. Department of Health and Human Services. Preventing Tobacco Use Among Young  
26 People A Report of the General Surgeon. 1994.  
27  
28
- 29 4. Hartmann-Boyce J, McRobbie H, Bullen C, et al. Electronic cigarettes for smoking cessation.  
30 *Cochrane Database Syst Rev* 2016 Sep 14;9:CD010216.  
31  
32
- 33 5. Malas M, van der Tempel J, Schwartz R, et al. Electronic Cigarettes for Smoking Cessation: A  
34 Systematic Review. *Nicotine Tob Res* 2016 Oct;18(10):1926-1936.  
35  
36
- 37 6. National Academies of Sciences Engineering and Medicine. Public Health Consequences of  
38 E-Cigarettes [Internet]. Stratton K, Kwan LY, Eaton DL, editors. Washington, D.C.: The  
39 National Academies Press; 2018. Available from: <http://www.nap.edu/catalog/24952>  
40  
41
- 42 7. Reid JL, Rynard VL, Czoli CD, et al. Who is using e-cigarettes in Canada? Nationally  
43 representative data on the prevalence of e-cigarette use among Canadians. *Prev*  
44 *Med* 2015 Dec;81:180-183.  
45  
46
- 47 8. Carroll Chapman SL, Wu LT. E-cigarette prevalence and correlates of use among adolescents  
48 versus adults: a review and comparison. *J Psychiatr Res* 2014 Jul;54:43-54.  
49  
50
- 51 9. Dutra LM, Glantz SA. Electronic cigarettes and conventional cigarette use among U.S.  
52 adolescents: a cross-sectional study. *JAMA Pediatr* 2014 Jul;168(7):610-617.  
53  
54
- 55 10. Leventhal AM, Strong DR, Kirkpatrick MG, et al. Association of Electronic Cigarette Use  
56 With Initiation of Combustible Tobacco Product Smoking in Early Adolescence. *JAMA* 2015 Aug  
57 18;314(7):700-707.  
58  
59  
60

11. Soneji S, Barrington-Trimis JL, Wills TA, et al. Association Between Initial Use of e-Cigarettes and Subsequent Cigarette Smoking Among Adolescents and Young Adults: A Systematic Review and Meta-analysis. *JAMA Pediatr* 2017 Aug 1;171(8):788-797.
12. Pierce JP, Choi WS, Gilpin EA, et al. Validation of susceptibility as a predictor of which adolescents take up smoking in the United States. *Health Psychol* 1996 Sep;15(5):355-361
13. Cole AG, Kennedy RD, Chaurasia A, Leatherdale ST. (Accepted). Exploring the predictive validity of the susceptibility to smoking construct for tobacco cigarettes, alternative tobacco products, and e-cigarettes. *Nicotine & Tobacco Research*. doi: 10.1093/ntr/ntx265.
14. Barrington-Trimis JL, Berhane K, Unger JB, et al. The E-cigarette Social Environment, E-cigarette Use, and Susceptibility to Cigarette Smoking. *J Adolesc Health* 2016 Jul;59(1):75-80.
15. Bunnell RE, Agaku IT, Arrazola RA, et al. Intentions to smoke cigarettes among never-smoking US middle and high school electronic cigarette users: National Youth Tobacco Survey, 2011-2013. *Nicotine Tob Res* 2015 Feb;17(2):228-235.
16. Park JY, Seo DC, Lin HC. E-Cigarette Use and Intention to Initiate or Quit Smoking Among US Youths. *Am J Public Health* 2016 Apr;106(4):672-678.
17. Primack BA, Soneji S, Stoolmiller M, et al. Progression to Traditional Cigarette Smoking After Electronic Cigarette Use Among US Adolescents and Young Adults. *JAMA Pediatr* 2015 Nov;169(11):1018-1023.
18. Barrington-Trimis JL, Urman R, Berhane K, et al. E-Cigarettes and Future Cigarette Use. *Pediatrics* 2016 Jul;138(1):10.1542/peds.2016-0379.Epub 2016 Jun 13.
19. Leatherdale ST, Brown KS, Carson V, et al. The COMPASS study: a longitudinal hierarchical research platform for evaluating natural experiments related to changes in school-level programs, policies and built environment resources. *BMC Public Health* 2014 Apr 8;14:331-2458-14-331.
20. Bredin C, Thompson-Haile A, Leatherdale ST. Supplemental sampling and recruitment of additional schools in Ontario. 2015.
21. Bredin C, Leatherdale ST. Methods of linking COMPASS student-level data over time. 2013.
22. Qian W, Battista K, Bredin C, Brown KS, Leatherdale ST. Assessing longitudinal data linkage results in the COMPASS study: Technical Report Series. 2015; 3(4). Waterloo, Ontario: University of Waterloo. Available at: <https://uwaterloo.ca/compass-system/publications#technical>
23. Zeger, S. L., & Liang, K.-Y. (1986). Longitudinal data analysis for discrete and continuous outcomes. *Biometrics*, 42, 121-130.

- 1
- 2
- 3 24. Montreuil A, MacDonald M, Asbridge M, et al. Prevalence and correlates of electronic
- 4 cigarette use among Canadian students: cross-sectional findings from the 2014/15 Canadian
- 5 Student Tobacco, Alcohol and Drugs Survey. *CMAJ Open* 2017 Jun 14;5(2):E460-E467.
- 6
- 7
- 8 25. Reid JL, Hammond D, Rynard VL, et al. Tobacco Use in Canada: Patterns and Trends. 2017.
- 9
- 10 26. Zhu SH, Sun JY, Bonnevie E, et al. Four hundred and sixty brands of e-cigarettes and
- 11 counting: implications for product regulation. *Tob Control* 2014 Jul;23 Suppl 3:iii3-9.
- 12
- 13 27. Hoffman AC, Salgado RV, Dresler C, et al. Flavour preferences in youth versus adults: a
- 14 review. *Tob Control* 2016 Nov;25(Suppl 2):ii32-ii39.
- 15
- 16
- 17 28. Bird Y, May J, Nwankwo C, et al. Prevalence and characteristics of flavoured tobacco use
- 18 among students in grades 10 through 12: a national cross-sectional study in Canada, 2012-2013.
- 19 *Tob Induc Dis* 2017 Mar 24;15:20-017-0124-0.eCollection 2017.
- 20
- 21 29. de Andrade M, Hastings G, Angus K. Promotion of electronic cigarettes: tobacco marketing
- 22 reinvented? *BMJ* 2013 Dec 21;347:f7473.
- 23
- 24
- 25 30. Duke JC, Lee YO, Kim AE, et al. Exposure to electronic cigarette television advertisements
- 26 among youth and young adults. *Pediatrics* 2014 Jul;134(1):e29-36.
- 27
- 28 31. Stanbrook MB. Electronic cigarettes and youth: a gateway that must be shut. *CMAJ* 2016 Aug
- 29 9;188(11):785.
- 30
- 31 32. McKee M. Electronic cigarettes: proceed with great caution. *Int J Public*
- 32 *Health* 2014 Oct;59(5):683-685.
- 33
- 34 33. Glasser AM, Collins L, Pearson JL, et al. Overview of Electronic Nicotine Delivery Systems:
- 35 A Systematic Review. *Am J Prev Med* 2017 Feb;52(2):e33-e66.
- 36
- 37 34. Smith et al 2015. Adolescent nicotine induces persisting changes in development of neural
- 38 connectivity. *Neuroscience & Biobehavioral Reviews*, 55, 432-433.
- 39
- 40 35. Yuan et al. 2015. Nicotine and the adolescent brain. *The Journal of Physiology*, 593(16),
- 41 3397-3412.
- 42
- 43 36. Barraza LF, Weidenaar KE, Cook LT, et al. Regulations and policies regarding e-cigarettes.
- 44 *Cancer* 2017 Aug 15;123(16):3007-3014.
- 45
- 46 37. Thompson-Haile A, Bredin C, Leatherdale S. Rationale for using an Active-Information
- 47 Passive-Consent Permission Protocol in COMPASS. 2013;COMPASS Technical Report Series
- 48 volume 1.
- 49
- 50
- 51
- 52
- 53
- 54
- 55
- 56
- 57
- 58
- 59
- 60

1  
2  
3  
4  
5  
6  
7  
8  
9  
10  
11  
12  
13  
14  
15  
16  
17  
18  
19  
20  
21  
22  
23  
24  
25  
26  
27  
28  
29  
30  
31  
32  
33  
34  
35  
36  
37  
38  
39  
40  
41  
42  
43  
44  
45  
46  
47  
48  
49  
50  
51  
52  
53  
54  
55  
56  
57  
58  
59  
60

For peer review only

1  
2  
3  
4  
5  
6  
7  
8  
9  
10  
11  
12  
13  
14  
15  
16  
17  
18  
19  
20  
21  
22  
23  
24  
25  
26  
27  
28  
29  
30  
31  
32  
33  
34  
35  
36  
37  
38  
39  
40  
41  
42  
43  
44  
45  
46  
47  
48  
49  
50  
51  
52  
53  
54  
55  
56  
57  
58  
59  
60

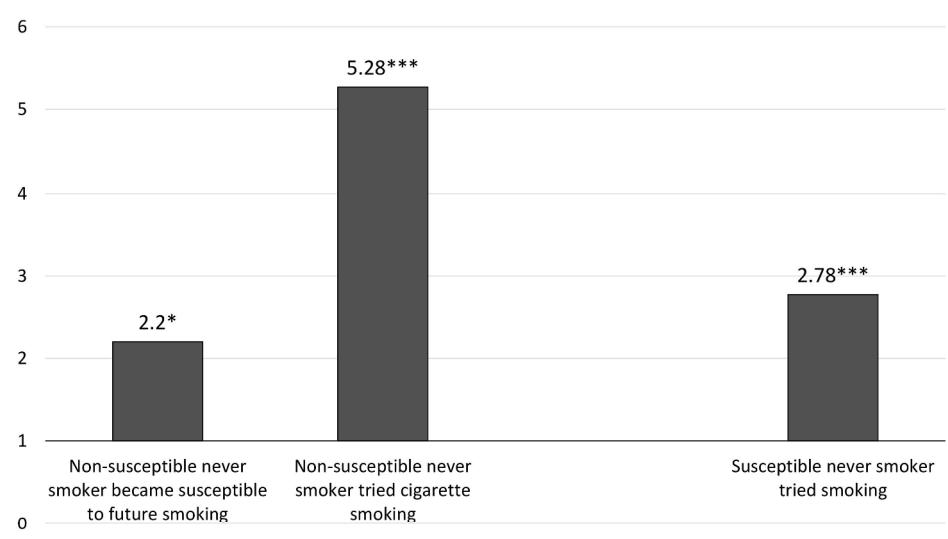

Note: Logistic regression models accounted for student-level clustering within schools and controlled for gender, grade, self-reported ethnicity, the number of friends that smoke cigarettes at baseline, and weekly spending money at baseline.

\* p<0.05; \*\* p<0.01; \*\*\* p<0.001

Figure 2: Adjusted odds ratio estimate of becoming susceptible to future smoking and trying tobacco cigarette smoking at follow-up among baseline non-susceptible and susceptible never smokers, 2013-2016 COMPASS study

254x190mm (300 x 300 DPI)

View only

**STROBE 2007 (v4) Statement—Checklist of items that should be included in reports of *cohort studies***

| Section/Topic                | Item # | Recommendation                                                                                                                                                                       | Reported on page # |
|------------------------------|--------|--------------------------------------------------------------------------------------------------------------------------------------------------------------------------------------|--------------------|
| Title and abstract           | 1      | (a) Indicate the study's design with a commonly used term in the title or the abstract                                                                                               | 1- 2               |
|                              |        | (b) Provide in the abstract an informative and balanced summary of what was done and what was found                                                                                  | 2                  |
| <b>Introduction</b>          |        |                                                                                                                                                                                      |                    |
| Background/rationale         | 2      | Explain the scientific background and rationale for the investigation being reported                                                                                                 | 3-5                |
| Objectives                   | 3      | State specific objectives, including any prespecified hypotheses                                                                                                                     | 4-5                |
| <b>Methods</b>               |        |                                                                                                                                                                                      |                    |
| Study design                 | 4      | Present key elements of study design early in the paper                                                                                                                              | 6                  |
| Setting                      | 5      | Describe the setting, locations, and relevant dates, including periods of recruitment, exposure, follow-up, and data collection                                                      | 6-7                |
| Participants                 | 6      | (a) Give the eligibility criteria, and the sources and methods of selection of participants. Describe methods of follow-up                                                           | 6-7                |
|                              |        | (b) For matched studies, give matching criteria and number of exposed and unexposed                                                                                                  | N/A                |
| Variables                    | 7      | Clearly define all outcomes, exposures, predictors, potential confounders, and effect modifiers. Give diagnostic criteria, if applicable                                             | 7-8                |
| Data sources/<br>measurement | 8*     | For each variable of interest, give sources of data and details of methods of assessment (measurement). Describe comparability of assessment methods if there is more than one group | 7-8                |
| Bias                         | 9      | Describe any efforts to address potential sources of bias                                                                                                                            | 6, 14              |
| Study size                   | 10     | Explain how the study size was arrived at                                                                                                                                            | 6-7                |
| Quantitative variables       | 11     | Explain how quantitative variables were handled in the analyses. If applicable, describe which groupings were chosen and why                                                         | 8-9                |
| Statistical methods          | 12     | (a) Describe all statistical methods, including those used to control for confounding                                                                                                | 8-9                |
|                              |        | (b) Describe any methods used to examine subgroups and interactions                                                                                                                  | 9                  |
|                              |        | (c) Explain how missing data were addressed                                                                                                                                          | 7                  |
|                              |        | (d) If applicable, explain how loss to follow-up was addressed                                                                                                                       | 7                  |
|                              |        | (e) Describe any sensitivity analyses                                                                                                                                                | N/A                |
| <b>Results</b>               |        |                                                                                                                                                                                      |                    |

|                          |     |                                                                                                                                                                                                              |       |
|--------------------------|-----|--------------------------------------------------------------------------------------------------------------------------------------------------------------------------------------------------------------|-------|
| Participants             | 13* | (a) Report numbers of individuals at each stage of study—eg numbers potentially eligible, examined for eligibility, confirmed eligible, included in the study, completing follow-up, and analysed            | 6-7   |
|                          |     | (b) Give reasons for non-participation at each stage                                                                                                                                                         | 6-7   |
|                          |     | (c) Consider use of a flow diagram                                                                                                                                                                           | N/A   |
| Descriptive data         | 14* | (a) Give characteristics of study participants (eg demographic, clinical, social) and information on exposures and potential confounders                                                                     | 9-10  |
|                          |     | (b) Indicate number of participants with missing data for each variable of interest                                                                                                                          | 7     |
|                          |     | (c) Summarise follow-up time (eg, average and total amount)                                                                                                                                                  | N/A   |
| Outcome data             | 15* | Report numbers of outcome events or summary measures over time                                                                                                                                               | 10-11 |
| Main results             | 16  | (a) Give unadjusted estimates and, if applicable, confounder-adjusted estimates and their precision (eg, 95% confidence interval). Make clear which confounders were adjusted for and why they were included | 9-11  |
|                          |     | (b) Report category boundaries when continuous variables were categorized                                                                                                                                    | N/A   |
|                          |     | (c) If relevant, consider translating estimates of relative risk into absolute risk for a meaningful time period                                                                                             | N/A   |
| Other analyses           | 17  | Report other analyses done—eg analyses of subgroups and interactions, and sensitivity analyses                                                                                                               | N/A   |
| <b>Discussion</b>        |     |                                                                                                                                                                                                              |       |
| Key results              | 18  | Summarise key results with reference to study objectives                                                                                                                                                     | 11-12 |
| <b>Limitations</b>       |     |                                                                                                                                                                                                              |       |
| Interpretation           | 20  | Give a cautious overall interpretation of results considering objectives, limitations, multiplicity of analyses, results from similar studies, and other relevant evidence                                   | 11-14 |
| Generalisability         | 21  | Discuss the generalisability (external validity) of the study results                                                                                                                                        | 14    |
| <b>Other information</b> |     |                                                                                                                                                                                                              |       |
| Funding                  | 22  | Give the source of funding and the role of the funders for the present study and, if applicable, for the original study on which the present article is based                                                | 16    |

\*Give information separately for cases and controls in case-control studies and, if applicable, for exposed and unexposed groups in cohort and cross-sectional studies.

**Note:** An Explanation and Elaboration article discusses each checklist item and gives methodological background and published examples of transparent reporting. The STROBE checklist is best used in conjunction with this article (freely available on the Web sites of PLoS Medicine at <http://www.plosmedicine.org/>, Annals of Internal Medicine at <http://www.annals.org/>, and Epidemiology at <http://www.epidem.com/>). Information on the STROBE Initiative is available at [www.strobe-statement.org](http://www.strobe-statement.org).
